# Supplementary material for: In situ FTIR spectroscopy to unravel the bifunctional nature of aromatics hydrogenation synergy on zeolite/metal catalysts
Source: Royal Society of Chemistry journal article supplement (doi:10.1039/d1cy01724a), 2021-12-17
Supplement: d1cy01724a1.pdf [file d1cy01724a1.pdf]

## Supplementary Information

Role of EFAI species and proximity between Brønsted and metal sites in hydrogenation  
on bifunctional catalysts

Nuno Batalha<sup>a,\*</sup>, Jean-Dominique Comparot<sup>a</sup>, Anthony Le Valant<sup>a</sup>, Ludovic Pinard<sup>a,\*</sup>

<sup>a</sup> Institut de Chimie des Milieux et Matériaux de Poitiers (IC2MP), Université de Poitiers, CNRS, F-86073 Poitiers, France

\*corresponding author : nuno.rocha-batalha@ircelyon.univ-lyon1.fr;  
ludovic.pinard@univ-poitiers.fr

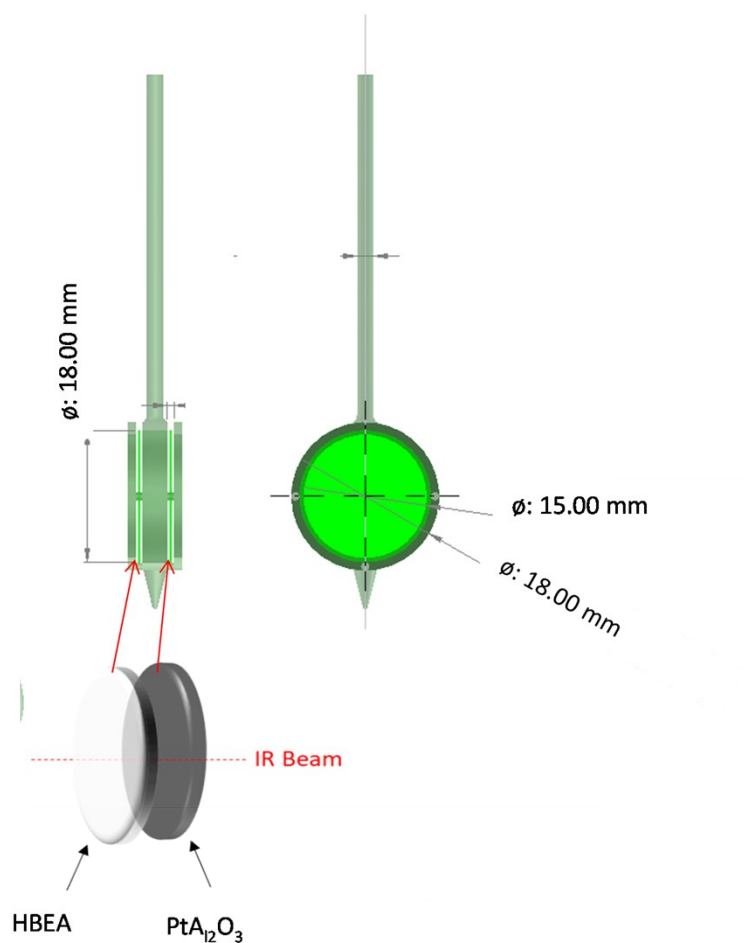

Figure S1. Schematic representation of the PtA|HBEA sample analysis.

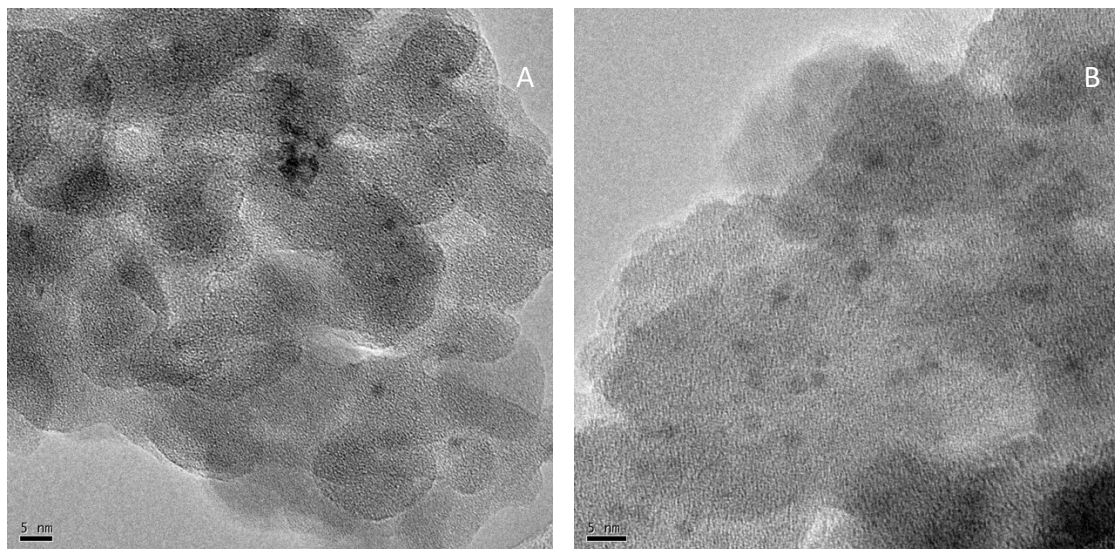

Figure S2. TEM micrographs of 0.5PtHBEA (A) and 1PtHBEA (B) catalysts.

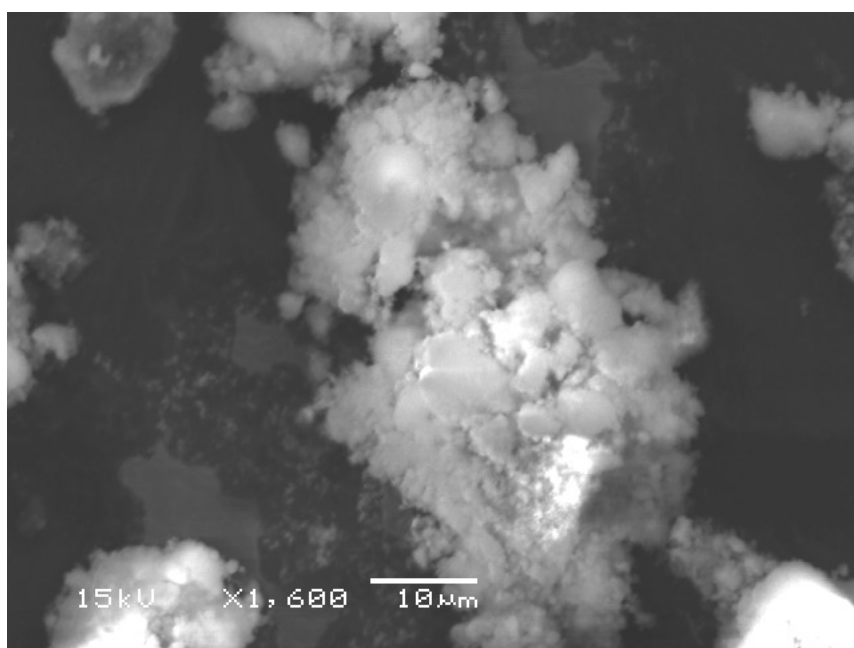

Figure S3. SEM micrographs of HBEA.

Table S1. Impact of the mixture between  $\gamma$ -Al<sub>2</sub>O<sub>3</sub> and HBEA on acid properties of PtA+HBEA samples.

|                                               | Brønsted acidity – [PyH <sup>+</sup> ] <sup>a</sup> | Lewis acidity – [PyL] <sup>b</sup> |
|-----------------------------------------------|-----------------------------------------------------|------------------------------------|
|                                               | ( $\mu\text{mol.g}^{-1}$ )                          | ( $\mu\text{mol.g}^{-1}$ )         |
| HBEA (CP-814E - Zeolyst) <sup>c</sup>         | 448                                                 | 208                                |
| Al <sub>2</sub> O <sub>3</sub> <sup>d</sup>   | -                                                   | 172                                |
| Al <sub>2</sub> O <sub>3</sub> + HBEA (50-50) | 169 (224) <sup>e</sup>                              | 145 (190) <sup>e</sup>             |

<sup>a</sup> number of protonic sites able to retain pyridine [PyH<sup>+</sup>] at 220 °C.

<sup>b</sup> Lewis sites able to retain pyridine [PyL] at 220 °C.

<sup>c</sup> BEA zeolite from Zeolyst (ref: CP-814E) was used as a replacement for the sample used in the main manuscript due to unavailability of the original HBEA zeolite.

<sup>d</sup> The Al<sub>2</sub>O<sub>3</sub> sample presented in this table is a new batch made from the same boehmite material as the one presented in the main manuscript.

<sup>e</sup> Values in brackets correspond to theoretical site density based on the relative proportions of Al<sub>2</sub>O<sub>3</sub> and HBEA in the sample.

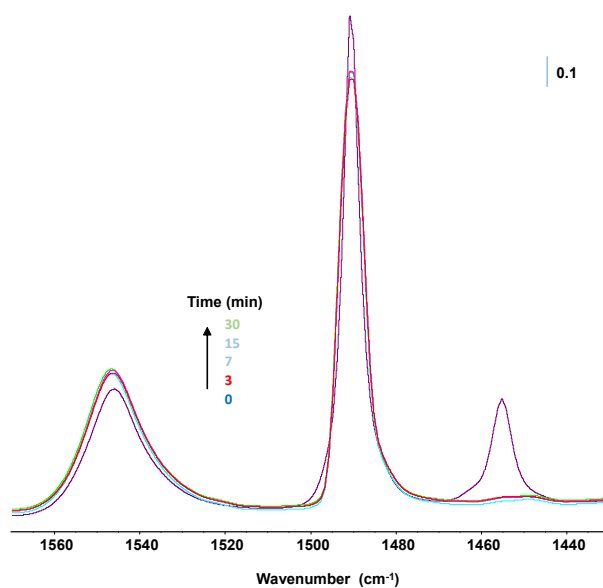

Figure S4. Pyridinium (PyH<sup>+</sup> - 1545 cm<sup>-1</sup>) and pyridine coordinated on Lewis sites (PyL – 1455 cm<sup>-1</sup>) bands evolution time with a hydrogen pressure of 6 mbar in the infrared cell for 1PtHBEA saturated with pyridine at 220 °C

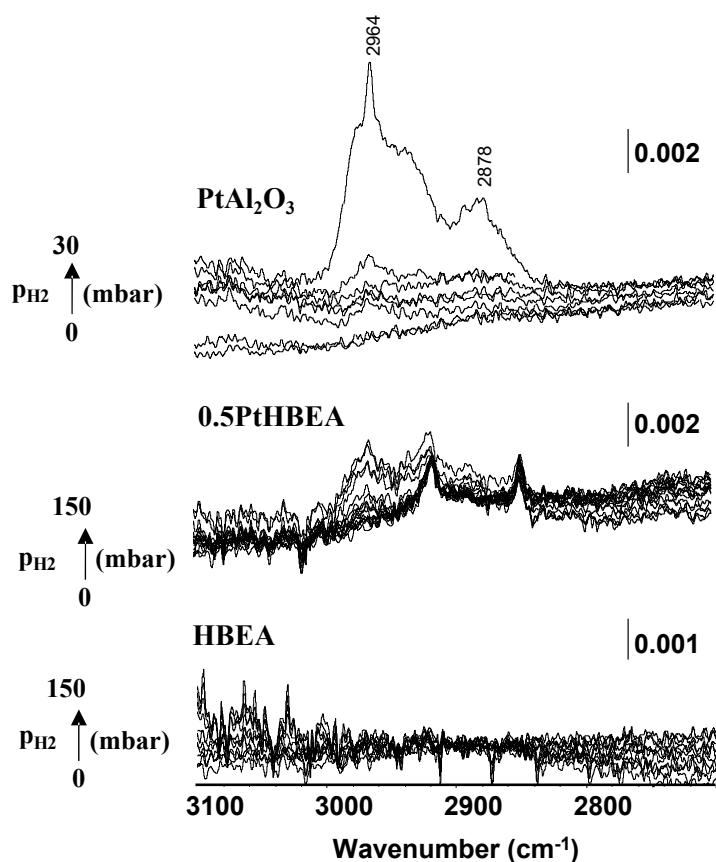

Figure S5. C-H characteristic bands ( $3100 - 2700 \text{ cm}^{-1}$ ) of the gas phase as function of hydrogen pressure during the hydrogenation of adsorbed pyridine at  $220^\circ\text{C}$ .

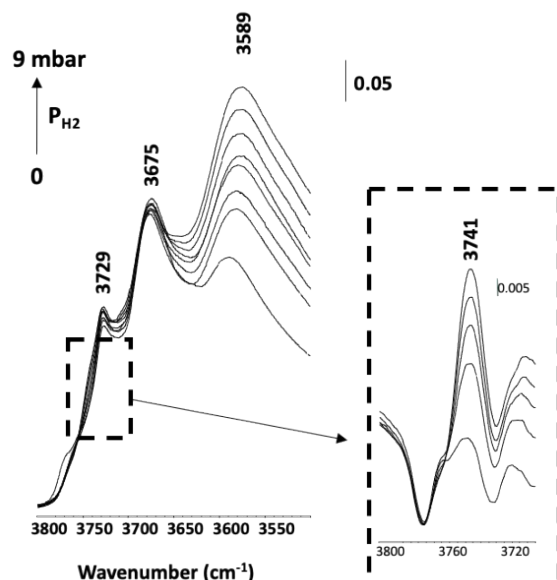

Figure S6. Hydroxyl characteristic bands ( $3500 - 3850 \text{ cm}^{-1}$ ) of  $\text{PtAl}_2\text{O}_3$  catalyst as function of hydrogen pressure during the hydrogenation of adsorbed pyridine at  $220^\circ\text{C}$ . In the square is highlighted the variation of the band at  $3741 \text{ cm}^{-1}$  relative to the reference spectrum at  $P(\text{H}_2) = 0 \text{ mbar}$ .

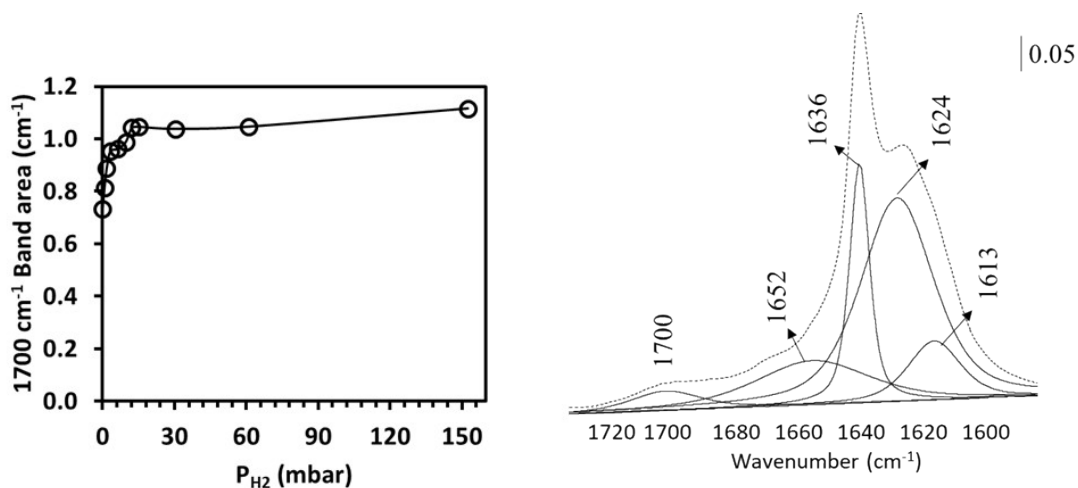

Figure S7. Left) Evolution of the 1700 cm<sup>-1</sup> band characteristic of Al-H bond. Right) Deconvolution of the IR spectrum of HBEA adsorbed with pyridine under 9 mbar of H<sub>2</sub>.

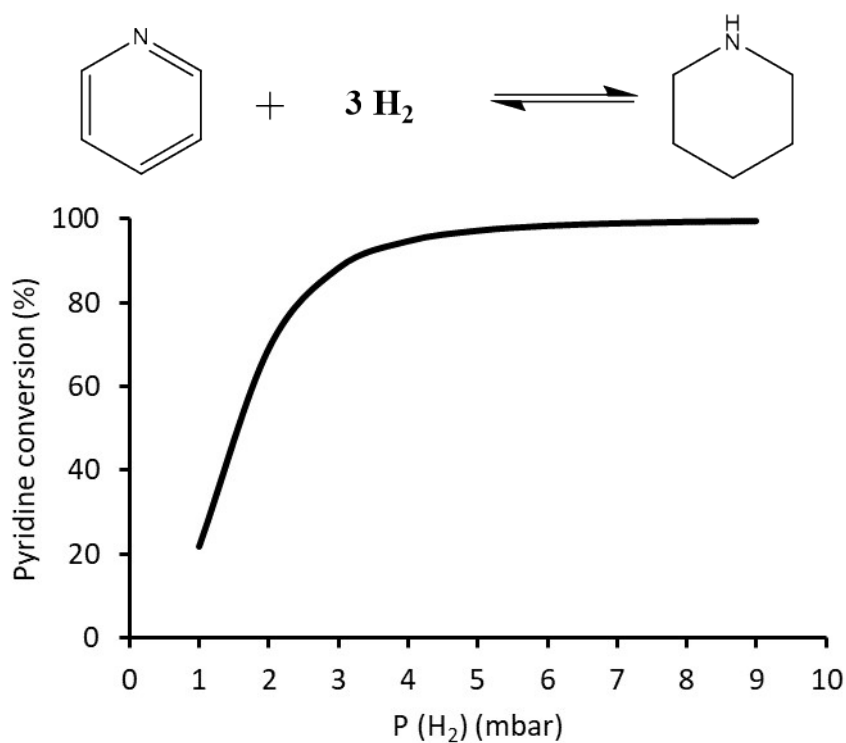

Figure S8. Equilibrium conversion the hydrogenation of pyridine adsorbed on 0.5PtHBEA (Py=9.6 μmol) as a function of hydrogen pressure. The reaction was considered to occur in the gas phase at 220 °C, and system volume, i.e., IR cell volume is 544.4 mL.
